# Supplementary material
Source: PubMed Central journal article supplement (PMC3994981)
Supplement: NIHMS566173-supplement-Supplementary_Table_1.pdf [file NIHMS566173-supplement-Supplementary_Table_1.pdf]

Supplementary Table 1

| <u>Agent Class</u>                     | <u>Agent Name</u>                       | <u>Company</u>    | <u>Clinical Trial Phase</u> | <u>Reference</u> <sup>a</sup>          |
|----------------------------------------|-----------------------------------------|-------------------|-----------------------------|----------------------------------------|
| <i>Pan-class I PI3K</i>                | GDC-0941                                | Genentech         | 1, 2                        | 1                                      |
|                                        | NVP-BKM120                              | Novartis          | 1, 2                        | 2                                      |
|                                        | XL147 (SAR245408)                       | Sanofi            | 1, 2                        | 3                                      |
|                                        | PX-866                                  | Oncothyreon       | 1, 2                        | 4                                      |
|                                        | BAY806946                               | Bayer             | 1, 2                        | 5                                      |
|                                        | CH5132799                               | Chugai            | 1                           | 6                                      |
| <i>Isoform-selective PI3K (target)</i> | NVP-BYL719 (p110 $\alpha$ )             | Novartis          | 1, 2                        | 7                                      |
|                                        | MLN1117 (p110 $\alpha$ )                | Millennium        | 1                           | 8                                      |
|                                        | AZD8186 (p110 $\beta$ )                 | Astra-Zeneca      | 1                           | doi: 10.1158/1538-7445.<br>AM2013-3264 |
|                                        | SAR260301 (p110 $\beta$ )               | Sanofi            | 1                           | doi: 10.1158/1538-7445.<br>AM2013-3258 |
|                                        | GSK2636771 (p110 $\beta$ )              | Glaxo Smith Kline | 1                           |                                        |
|                                        | GS-1101 (p110 $\delta$ )                | Gilead            | 1, 2, 3                     | 9                                      |
|                                        | AMG 319 (p110 $\delta$ )                | Amgen             | 1                           | Not published                          |
|                                        | GS-9820                                 | Gilead            | 1,2                         | Not published                          |
|                                        | IPI-145 (p110 $\delta/\gamma$ )         | Infinity          | 1, 2                        | Not published                          |
|                                        | GDC-0032 (p110 $\alpha/\delta/\gamma$ ) | Genentech         | 1                           | 10                                     |
| <i>PI3K (unspecified)</i>              | GDC-0084                                | Genentech         | 1                           | Not published                          |
| <i>Rapalog</i>                         | RAD001 (everolimus)                     | Novartis          | approved                    |                                        |
|                                        | CCI-779 (temsirolimus)                  | Wyeth/Pfizer      | approved                    |                                        |
|                                        | AP23573 (deforolimus)                   | ARIAD/Merck       | approved                    |                                        |
| <i>mTOR kinase inhibitor</i>           | MLN0128                                 | Millennium        | 1                           | 11                                     |
|                                        | AZD2014                                 | Astra-Zeneca      | 1, 2                        | 12                                     |
|                                        | OSI-027                                 | OSI/Estellas      | 1                           | 13                                     |
|                                        | CC-223                                  | CelGene           | 1, 2                        | Not published                          |
| <i>panPI3K/mTOR inhibitor</i>          | NVP-BEZ235                              | Novartis          | 1, 2                        | 14                                     |
|                                        | NVP-BGT226                              | Novartis          | 1,2                         | 15                                     |

## SUPPLEMENTARY INFORMATION

|                      |                   |                   |      |               |
|----------------------|-------------------|-------------------|------|---------------|
|                      | XL765 (SAR245409) | Sanofi            | 1, 2 | 16            |
|                      | GDC-0980          | Genentech         | 1, 2 | 17            |
| <i>AKT inhibitor</i> | MK-2206           | Merck             | 1, 2 | 18            |
|                      | GDC-0068          | Genentech         | 1, 2 | 19            |
|                      | GSK2141795        | Glaxo Smith Kline | 1, 2 | 20            |
|                      | GSK2110183        | Glaxo Smith Kline | 1    | Not published |
|                      | AZD5363           | Astra-Zeneca      | 1    | 21            |

<sup>a</sup> References listed [on next page](#)

### Supplementary references

- Folkes, A.J. et al. The identification of 2-(1H-indazol-4-yl)-6-(4-methanesulfonyl-piperazin-1-ylmethyl)-4-morpholin-4-yl-thieno[3,2-d]pyrimidine (GDC-0941) as a potent, selective, orally bioavailable inhibitor of class I PI3 kinase for the treatment of cancer. *J Med Chem* **51**, 5522-32 (2008).
- Brachmann, S.M. et al. Characterization of the mechanism of action of the pan class I PI3K inhibitor NVP-BKM120 across a broad range of concentrations. *Mol Cancer Ther* **11**, 1747-57 (2012).
- Chakrabarty, A. et al. Trastuzumab-resistant cells rely on a HER2-PI3K-FoxO-survivin axis and are sensitive to PI3K inhibitors. *Cancer Res* **73**, 1190-200 (2013).
- Ihle, N.T. Molecular pharmacology and antitumor activity of PX-866, a novel inhibitor of phosphoinositide-3-kinase signaling. *Mol Cancer Ther* **3**, 763-772 (2004).
- Liu, N. et al. BAY 80-6946 is a highly selective intravenous PI3K inhibitor with potent p110 $\alpha$  and p110 $\delta$  activities in tumor cell lines and xenograft models. *Mol Cancer Ther* **12**, 2319-30 (2013).
- Ohwada, J. et al. Discovery and biological activity of a novel class I PI3K inhibitor, CH5132799. *Bioorg Med Chem Lett* **21**, 1767-72 (2011).
- Furet, P. et al. Discovery of NVP-BYL719 a potent and selective phosphatidylinositol-3 kinase alpha inhibitor selected for clinical evaluation. *Bioorg Med Chem Lett* (2013).
- Jessen, K. et al. A potent and selective PI3K inhibitor, INK1117, targets human cancers harboring oncogenic PIK3CA mutations. *Mol Cancer Ther* **10**, Abstract A171 (2011).
- Macias-Perez, I.M. & Flinn, I.W. GS-1101: a delta-specific PI3K inhibitor in chronic lymphocytic leukemia. *Curr Hematol Malig Rep* **8**, 22-7 (2013).
- Ndubaku, C.O. et al. Discovery of 2-{3-[2-(1-isopropyl-3-methyl-1H-1,2,4-triazol-5-yl)-5,6-dihydrobenzo[f]imidazo[1,2-d][1,4]oxazepin-9-yl]-1H-pyrazol-1-yl}-2-methylpropanamide (GDC-0032): a beta-sparing phosphoinositide 3-kinase inhibitor with high unbound exposure and robust in vivo antitumor activity. *J Med Chem* **56**, 4597-610 (2013).
- Hsieh, A.C. et al. The translational landscape of mTOR signalling steers cancer initiation and metastasis. *Nature* **485**, 55-61 (2012).
- Pike, K.G. et al. Optimization of potent and selective dual mTORC1 and mTORC2 inhibitors: the discovery of AZD8055 and AZD2014. *Bioorg Med Chem Lett* **23**, 1212-6 (2013).
- Bhagwat, S.V. et al. Preclinical Characterization of OSI-027, a Potent and Selective Inhibitor of mTORC1 and mTORC2: Distinct from Rapamycin. *Mol Cancer Ther* (2011).
- Maira, S.M. et al. Identification and characterization of NVP-BEZ235, a new orally available dual phosphatidylinositol 3-kinase/mammalian target of rapamycin inhibitor with potent in vivo antitumor activity. *Mol Cancer Ther* **7**, 1851-63 (2008).
- Chang, K.Y. et al. Novel phosphoinositide 3-kinase/mTOR dual inhibitor, NVP-BGT226, displays potent growth-inhibitory activity against human head and neck cancer cells in vitro and in vivo. *Clin Cancer Res* **17**, 7116-26 (2011).
- Prasad, G. et al. Inhibition of PI3K/mTOR pathways in glioblastoma and implications for combination therapy with temozolomide. *Neuro Oncol* (2011).
- Wallin, J.J. et al. GDC-0980 is a novel class I PI3K/mTOR kinase inhibitor with robust activity in cancer models driven by the PI3K pathway. *Mol Cancer Ther* **10**, 2426-36 (2011).
- Hirai, H. et al. MK-2206, an allosteric Akt inhibitor, enhances antitumor efficacy by standard chemotherapeutic agents or molecular targeted drugs in vitro and in vivo. *Mol Cancer Ther* **9**, 1956-67 (2010).
- Blake, J.F. et al. Discovery and preclinical pharmacology of a selective ATP-competitive Akt inhibitor (GDC-0068) for the treatment of human tumors. *J Med Chem* **55**, 8110-27 (2012).
- Pachl, F. et al. Characterization of a chemical affinity probe targeting Akt kinases. *J Proteome Res* **12**, 3792-800 (2013).
- Davies, B.R. et al. Preclinical pharmacology of AZD5363, an inhibitor of AKT: pharmacodynamics, antitumor activity, and correlation of monotherapy activity with genetic background. *Mol Cancer Ther* **11**, 873-87 (2012).
